# Supplementary material
Source: Research Square preprint supplement (doi:10.21203/rs.3.rs-8918776/v1)
Supplement: Supplementary file 1 [file 4bf7648f19b49457bd9aabf6.docx]

### Supplementary information 1

### Introduction and use of the checklist and recommendations

**Why:** Supervisors are responsible for implementing the work ability management practices at workplaces. The checklist and the related recommendations are intended as tools for workplaces for developing the implementation of work ability management practices from the perspective of supervisors.

**For whom:** The checklist and the recommendations can be used in different units, such as the service or profit area, and to select development areas. In addition to supervisors, persons from different roles in the organization, such as middle management, human resources and occupational safety, should be involved in the assessment and development of the implementation of work ability management. A multiprofessional group is needed because the methods for improving the implementation require the competence, work input and decision-making power of persons working in different positions.

**Content:** The electronically completed checklist contains 24 statements, the realization of which in one’s own workplace is assessed on a scale of yes, no, partly. The recommendations consist of ten points containing concrete proposals to support the implementation of work ability management. The recommendations have been divided into three types according to the factor contributing to implementation: competence, opportunities and motivation.

**Benefits:** The checklist helps supervisors, the leadership and HR to identify issues based on research and practical experience that contribute to successful implementation of work ability management and to select development areas. The recommendations provide concrete proposals for developing the implementation.

### How to use the checklist

**Fill in the checklist in a group**

- Invite persons responsible for work ability management, such as representatives from the senior management, middle management, supervisors, HR and occupational safety to meet for developing the implementation of work ability management. The person convening the meeting may be anyone from the above-mentioned groups. Note that the group should have representatives from different levels of management.
- Bring a paper or online version of the checklist to be filled in during your meeting. Remember to save the list you have filled in so that you can return to it later.

**Go through all items in the checklist**

- The checklist contains 24 statements, the realization of which in one’s own workplace is assessed on a scale of yes, no, partly.
- Pay particular attention to statements that require development and consider ways of influencing those areas.

**Agree on how to proceed**

- Select a maximum of three areas for development at a time and enter them in the first column of the planning form. Think about 1-3 measures for each development area and record them in the second column of the form. When planning the activities, use the recommendations on concrete measures.
- Agree on and record in the checklist how each matter will be promoted, what the schedule will be and who will be responsible for it.

**Follow-up, evaluate and communicate**

- Agree on when you will review the checklist measures and assess their progress and how they have succeeded.
- Remember to also communicate the results widely at the workplace.
