# Supplementary material
Source: Research Square preprint supplement (doi:10.21203/rs.3.rs-8918776/v1)
Supplement: Supplementary file 2 [file 619f7036faf51c8e7ebec21a.docx]

### Supplementary Information 2

### Checklist for the implementation of work ability management

| Unit assessed: |
| --- |
| Participants: |
| Date: |

| **Factors or practices linked to implementation** | Yes | No | Partly | Observations |
| --- | --- | --- | --- | --- |
| **Knowledge-based management** | | | | |
| Supervisors know the objectives set for work ability management both at the organizational level and at the level of their own unit. |  |  |  |  |
| Supervisors have sufficient competence in searching for, interpreting and using information related to the personnel’s work ability (e.g., absences, turnover, competence needs). |  |  |  |  |
| The top management is involved in defining how the information is used in managing the personnel’s work ability. |  |  |  |  |
| The workplace has functional, up-to-date and adequate information systems in place to support management. |  |  |  |  |
| The top management is interested in work ability management, allocates sufficient resources to it, and follows and evaluates its implementation. |  |  |  |  |
| **Models and practices for supporting work ability** | | | | |
| Information related to models supporting work ability, such as the early support model, is easy to find, and supervisors are able to use it. |  |  |  |  |
| Supervisors have sufficient competence for identifying the need for support for work ability. |  |  |  |  |
| Practices for identifying the psychological and physical strain of work and for responding to the strain have been agreed on at the workplace. |  |  |  |  |
| Issues affecting work ability, such as the employees’ health, competence and motivation as well as the work community, management and factors external to the workplace, have been considered in the workplace’s models supporting work ability. |  |  |  |  |
| The workplace's models supporting work ability consider all stages of work ability support: anticipation, early support and return-to-work support after a long absence. |  |  |  |  |
| The employees understand the importance of promoting and supporting work ability and their own role in it. |  |  |  |  |
| **Factors or practices linked to implementation** | Yes | No | Partly | Observations |
| **Cooperation and support** | | | | |
| Supervisors, HR and occupational safety have regular and sufficient cooperation practices. |  |  |  |  |
| Supervisors are familiar with the contents of the occupational healthcare agreement. |  |  |  |  |
| Supervisors are familiar with the roles, responsibilities and practices of different actors in occupational health cooperation and cooperation is smooth. |  |  |  |  |
| Middle management supports the supervisor´s coping at work and work management |  |  |  |  |
| Middle management supports supervisors in managing the employees’ work ability |  |  |  |  |
| Supervisors receive peer support for the management of work ability from other supervisors. |  |  |  |  |
| **Flow of information** | | | | |
| Information flow practices have been jointly agreed, and everyone is familiar with them. |  |  |  |  |
| Information flows consistently from leadership to employees and from the employee level to leadership. |  |  |  |  |
| Supervisors receive the information necessary for the processes in supporting the work ability of their employees from occupational healthcare. |  |  |  |  |
| **Organizational culture** | | | | |
| Supervisors are able to meet and support employees of different ages, at different stages of their careers and from different backgrounds. |  |  |  |  |
| Supervisors and employees are heard in decision-making. |  |  |  |  |
| Our workplace has an open, respectful and confidential atmosphere. |  |  |  |  |
| Supervisors are committed to the management of work ability |  |  |  |  |

### Development measures planning form

| **Development area** | **Measure** | **Responsible person(s)** | **Timetable** | **Follow-up** |
| --- | --- | --- | --- | --- |
|  | 1 |  |  |  |
| 2 |  |  |  |
| 3 |  |  |  |
|  | 1 |  |  |  |
| 2 |  |  |  |
| 3 |  |  |  |
|  | 1 |  |  |  |
| 2 |  |  |  |
| 3 |  |  |  |
